Title:  $V_D/V_T$ ,  $Q_s/Q_t$  AND THE END-TIDAL TO ARTERIAL  $PCO_2$  GRADIENT

Author: F. A. Burrows, MD, FRCPC

Affiliation: Department of Anaesthesia and the Research Institute, The Hospital for Sick Children and the University of Toronto, Toronto, Ontario

**Introduction:** The end-tidal to arterial  $PCO_2$  gradient ( $\Delta PCO_2$ ) results from two factors; the dead space to tidal volume ratio ( $V_D/V_T$ ) and the venous admixture ( $Q_s/Q_t$ ). An increase in either increases the  $\Delta PCO_2$ . Children with congenital heart disease (CHD) have abnormalities of both  $V_D/V_T$  and  $Q_s/Q_t$  which result in an increased  $\Delta PCO_2$ .<sup>1</sup> The relationship of the  $\Delta PCO_2$  to the  $V_D/V_T$  and  $Q_s/Q_t$  has not been investigated. The purpose of this study was to examine the relationship of the  $V_D/V_T$  and  $Q_s/Q_t$  to the  $\Delta PCO_2$  in children with CHD.

**Methods:** After approval from the Committee on Human Research 41 patients with cyanotic or acyanotic CHD scheduled for palliative or corrective cardiac surgery were studied (Table). The patients were divided into 4 groups: no structural intracardiac anomalies (normal group); acyanotic with increased pulmonary blood flow (PBF) (acyanotic group); cyanotic with increased PBF (cyanotic (I) group); and cyanotic with decreased PBF (cyanotic (D) group). After induction of general anesthesia with fentanyl ventilation was controlled with an Air Shields Ventimeter and Mapleson B breathing circuit. Anesthesia was maintained with fentanyl 6  $\mu g/kg/hr$ . Ventilatory parameters were adjusted to provide a  $PaCO_2$  in the clinical range (30-35 mm Hg). The study was performed after sternotomy with the patient in the supine position at 37°C rectal temperature. The patients were ventilated undisturbed for 5 minutes to obtain steady state conditions. Arterial and mixed venous blood (direct puncture) were drawn simultaneously with the recording of the distal end-tidal  $PCO_2$  ( $PetCO_2$ ).  $PetCO_2$  was measured by infrared analysis (Puritan-Bennett). To calculate mixed expired  $PCO_2$ , expired gas was collected in a Douglas bag using a two-way non-rebreathing valve.  $PetCO_2$  was corrected for barometric pressure and water vapour pressure.  $V_D/V_T$  and  $Q_s/Q_t$  were calculated using standard formulae.<sup>2</sup> The relationship between  $PetCO_2$  and  $PaCO_2$ ;  $\Delta PCO_2$  and  $V_D/V_T$ ;  $\Delta PCO_2$  and  $Q_s/Q_t$ ;  $V_D/V_T$  and  $Q_s/Q_t$  were determined by least squares linear regression. Slopes and elevations were compared using Student's t-test. Multiple linear regression analysis determined the relationship between  $\Delta PCO_2$ ,  $Q_s/Q_t$  and  $V_D/V_T$ . Statistical significance was accepted at  $p < 0.05$ .

**Results:**  $PetCO_2$  underestimated the  $PaCO_2$  in all patients studied with a mean ( $\pm$  SD)  $\Delta PCO_2$  of 7.46 ( $\pm$  4.87). The  $PetCO_2:PaCO_2$  relationship for the 4 groups is demonstrated in Figure 1. There was no statistical difference between the line of regression and the line of identity for the normal and acyanotic group of patients, but there was a statistical difference for the cyanotic (I) and cyanotic (D) groups of patients. The  $\Delta PCO_2$  increased as the  $V_D/V_T$  and  $Q_s/Q_t$  increased and their relationship is described by the multiple

linear regression equation:  $\Delta PCO_2 = 1.55 + 10.91 (Q_s/Q_t) + 13.38 (V_D/V_T)$  ( $r^2 = 0.69$ ).

**Discussion:** The  $PetCO_2$  underestimates the  $PaCO_2$  in children with CHD. The  $PetCO_2$  serves as an acceptable estimate of  $PaCO_2$  in normal and acyanotic groups of patients, but significantly underestimates the  $PaCO_2$  in cyanotic (I) and cyanotic (D) groups of patients. The  $\Delta PCO_2$  increases as  $V_D/V_T$  and  $Q_s/Q_t$ .  $V_D/V_T$  is the primary determinant of the  $\Delta PCO_2$ , but  $Q_s/Q_t$  becomes increasingly important as the magnitude of the  $Q_s/Q_t$  increases.

**References:**

1. Lindhal SGE, Yates AP, Hatch DJ. Anesthesiology 66:168-175, 1987
2. Nunn JF. Applied Respiratory Physiology. Second edition. London, Butterworths, 1978, pp 274-309, pp 227-32

| TABLE                 | AGE                | WEIGHT               | Hct                  |
|-----------------------|--------------------|----------------------|----------------------|
| Normals (n = 9)       | 6.21<br>$\pm$ 4.29 | 19.78<br>$\pm$ 14.46 | 36.76<br>$\pm$ 2.89  |
| Acyanotic (n = 9)     | 6.05<br>$\pm$ 2.85 | 16.48<br>$\pm$ 7.58  | 36.26<br>$\pm$ 4.28  |
| Cyanotic (I) (n = 9)  | 5.18<br>$\pm$ 3.23 | 16.48<br>$\pm$ 11.15 | 46.38<br>$\pm$ 7.03* |
| Cyanotic (D) (n = 14) | 5.88<br>$\pm$ 2.39 | 16.67<br>$\pm$ 7.67  | 50.32<br>$\pm$ 7.56* |

\* $p \leq 0.05$  different from the normal and acyanotic group

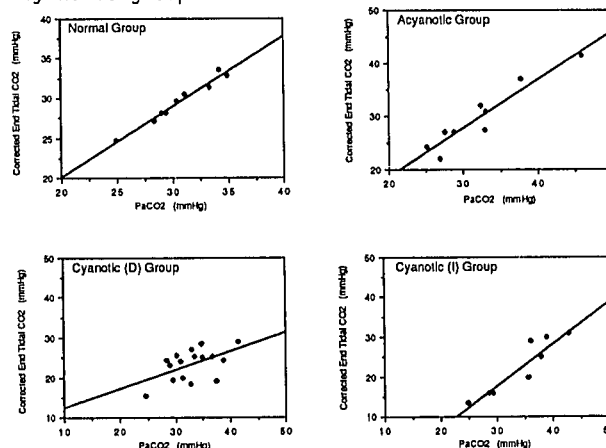

**Figure 1:**  $PetCO_2$  vs.  $PaCO_2$  for the four groups. Lines of regression are represented by (—) and described by the formulae: normal group  $y = 2.5 + 0.88x$  ( $R^2 = 0.96$ ); acyanotic group  $y = 0.61 + 0.91x$  ( $R^2 = 0.90$ ); cyanotic (I) group  $y = 14.21 + 1.06x$  ( $R^2 = 0.83$ ); cyanotic (D) group  $y = 7.88 + 0.47x$  ( $R^2 = 0.27$ ).
